# Supplementary material for: Protein-bound AGEs derived from methylglyoxal induce pro-inflammatory response and barrier integrity damage in epithelial cells by disrupting the retinol metabolism
Source: Royal Society of Chemistry journal article supplement (doi:10.1039/d4fo00364k), 2024-01-01
Supplement: d4fo00364k1.pdf [file d4fo00364k1.pdf]

## 1 **Supplementary Methods**

2 **Detection of ROS level.** The cellular ROS level was quantified by the DCFH assay with a  
3 commercial kit (Beyotime Biotechnology, Shanghai, China). Briefly, Caco-2 cells were  
4 seeded onto a 12-well plate ( $5 \times 10^5$  cells per well) and cultured for 24 h to allow cell  
5 attachment. After removing the medium, the cells were treated with PBS, BSA (0.5 mg/mL),  
6 or BSA-MGO (0.5 mg/mL) for another 24 h and then incubated with 2',7'-  
7 dichlorodihydrofluorescein diacetate (DCFH-DA, 10  $\mu$ M) for 20 min at 37 °C in the dark. Cells  
8 without any treatment served as the control, and cells treated with Rosup reagent and DCFH-  
9 DA were used for the positive control. After incubation, the cells were washed with PBS three  
10 times. Then, the cells were first observed and imaged by an Ortho-Fluorescent Microscopy  
11 (Nikon eclipse C1, Nikon, Tokyo, Japan) with a NIKON DS-U3 imaging system. The  
12 fluorescent density of the cell images was quantified by Image J software (version 1.53q,  
13 National Institutes of Health, MD, USA).

15 **Supplementary Table S1** The full set of pathways identified based on GSEA.

| <b>Gene set</b> | <b>Description</b>            | <b>ES</b>    | <b>NES</b>   | <b>p-value</b> | <b>FDR</b>   |
|-----------------|-------------------------------|--------------|--------------|----------------|--------------|
| HSA03040        | Spliceosome                   | -0.58        | -2.03        | 0              | 0.001        |
| HSA03010        | Ribosome                      | -0.43        | -1.55        | 0              | 0.312        |
| HSA03030        | DNA replication               | -0.55        | -1.57        | 0.017          | 0.355        |
| <b>HSA00830</b> | <b>Retinol metabolism</b>     | <b>-0.45</b> | <b>-1.44</b> | <b>0.018</b>   | <b>0.369</b> |
| HSA03430        | Mismatch repair               | -0.61        | -1.58        | 0.019          | 0.452        |
| HSA00983        | Drug metabolism-other enzymes | -0.44        | -1.41        | 0.027          | 0.425        |
| HSA05323        | Rheumatoid arthritis          | -0.39        | -1.32        | 0.027          | 0.585        |
| HSA00020        | Citrate cycle (TCA cycle)     | -0.53        | -1.49        | 0.028          | 0.316        |
| HSA03018        | RNA degradation               | -0.41        | -1.33        | 0.048          | 0.596        |

16

18 **Supplementary Figure S1** The second derivative spectra of BSA and BSA-MGO from their  
 19 respective FI-TC spectra.

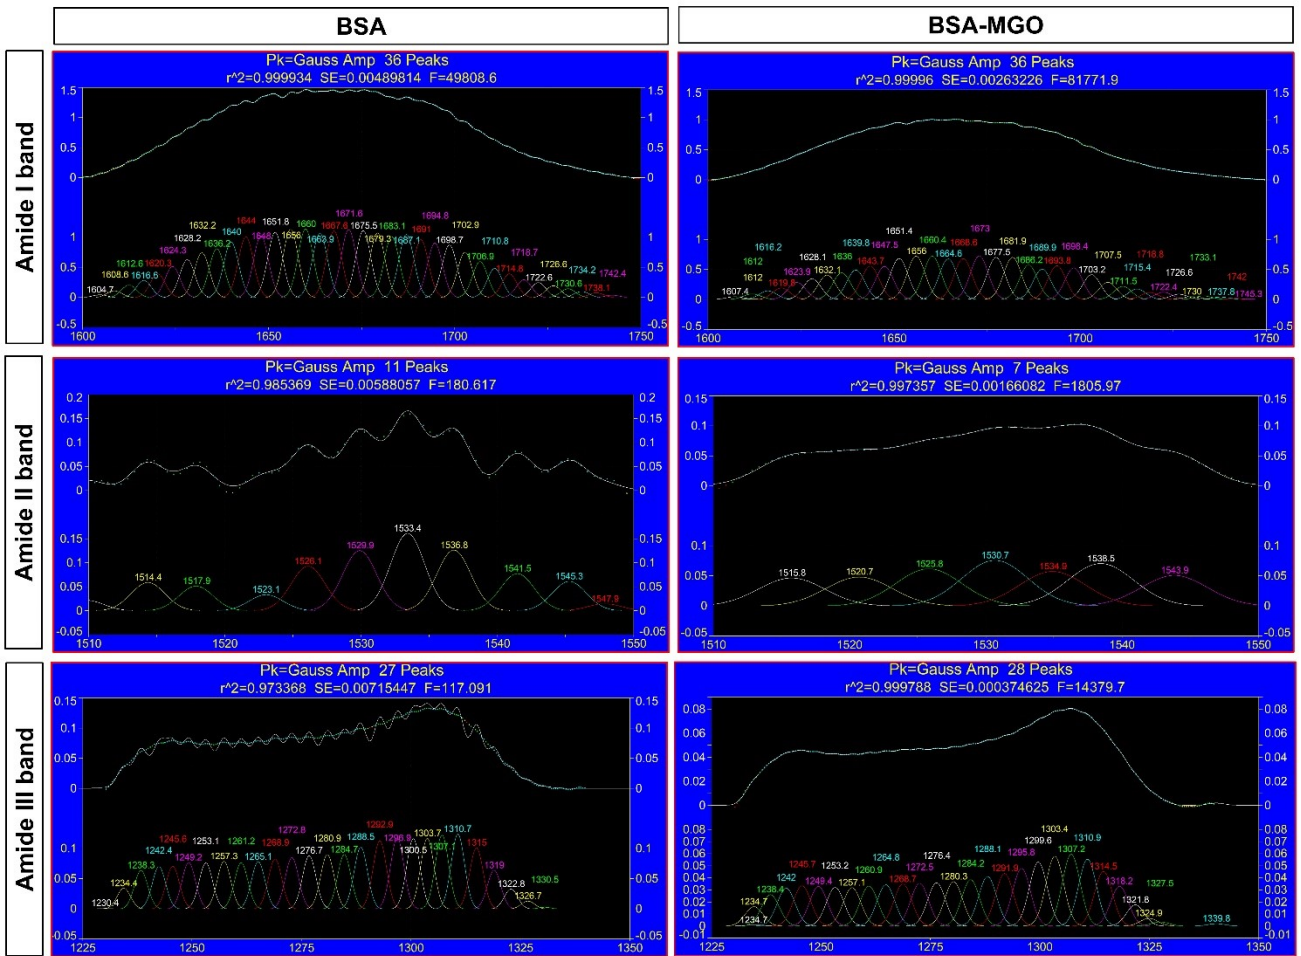

20

21

23 **Supplementary Figure S2** Relative mRNA levels of differentiation markers in pre- and  
24 post-confluent Caco-2 cells (A); cell cytotoxicity of BSA and BSA-MGO on differentiated  
25 Caco-2 cells (B). \* $p < 0.05$ , \*\* $p < 0.01$ , and \*\*\* $p < 0.001$ , Student's *t*-test or Mann-Whitney  
26 test.

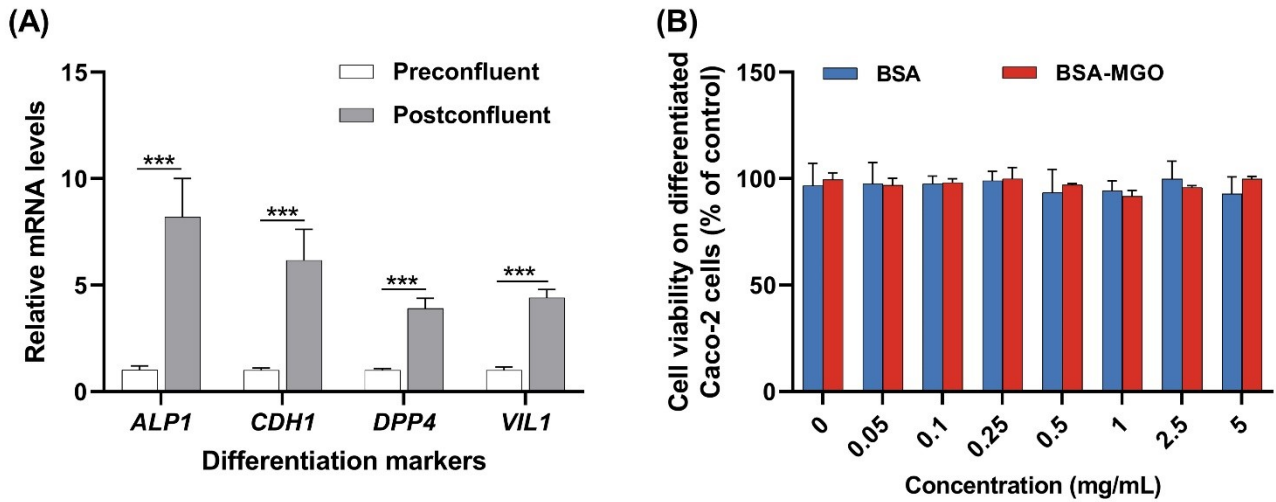

27  
28  
29  
30  
31  
32  
33  
34  
35  
36  
37  
38  
39

40

41 **Supplementary Figure S3** The mRNA expression levels of RAGE in Caco-2 cells upon  
42 treatment with samples. \* $p < 0.05$ , \*\* $p < 0.01$ , and \*\*\* $p < 0.001$ , Student's *t*-test or Mann-  
43 Whitney test.

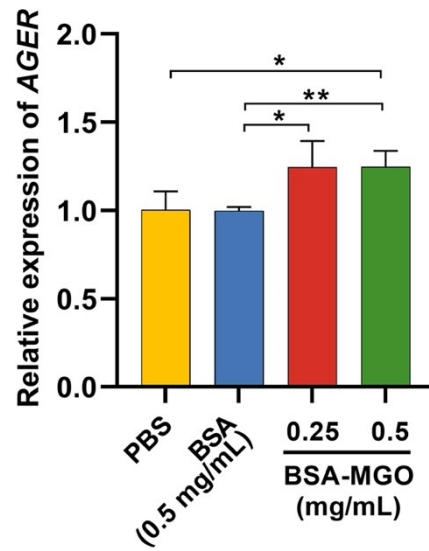

44

46 **Supplementary Figure S4** Representative image (A) and mean fluorescence intensity (B)  
47 of ROS levels in Caco-2 cells. \* $p < 0.05$ , \*\* $p < 0.01$ , and \*\*\* $p < 0.001$ , Student's *t*-test or Mann-  
48 Whitney test. Bars with different letters suggest statistical differences at  $p < 0.05$ , Tukey's  
49 test.

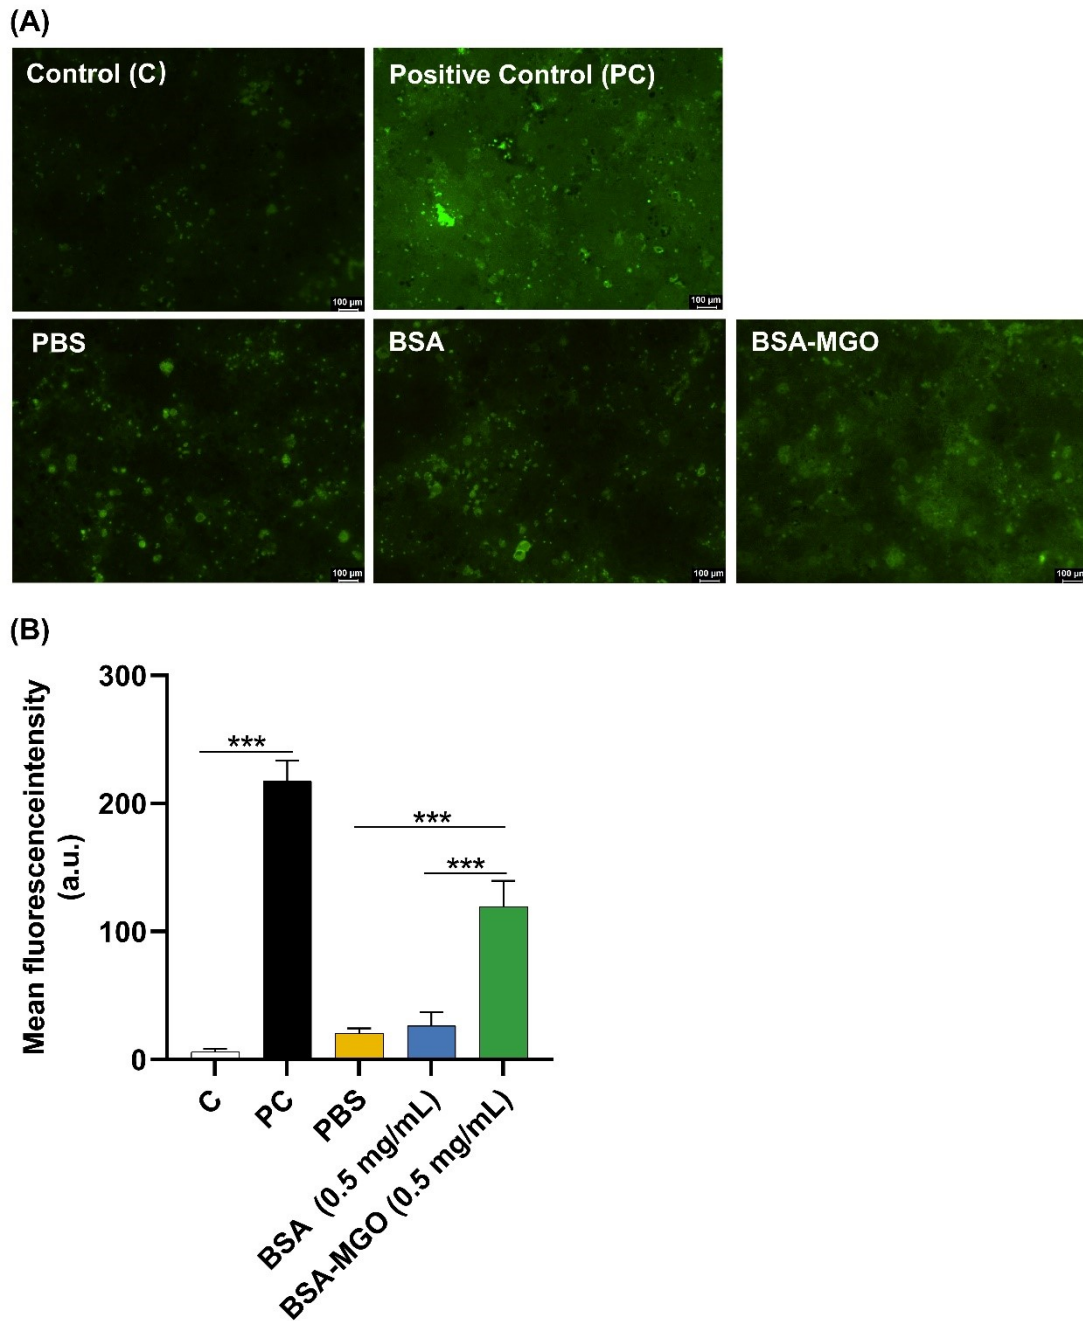

52 **Supplementary Figure S5** GO analysis identifying DEGs in biological processes (BP),  
 53 cellular components (CC), and molecular functions (MF).

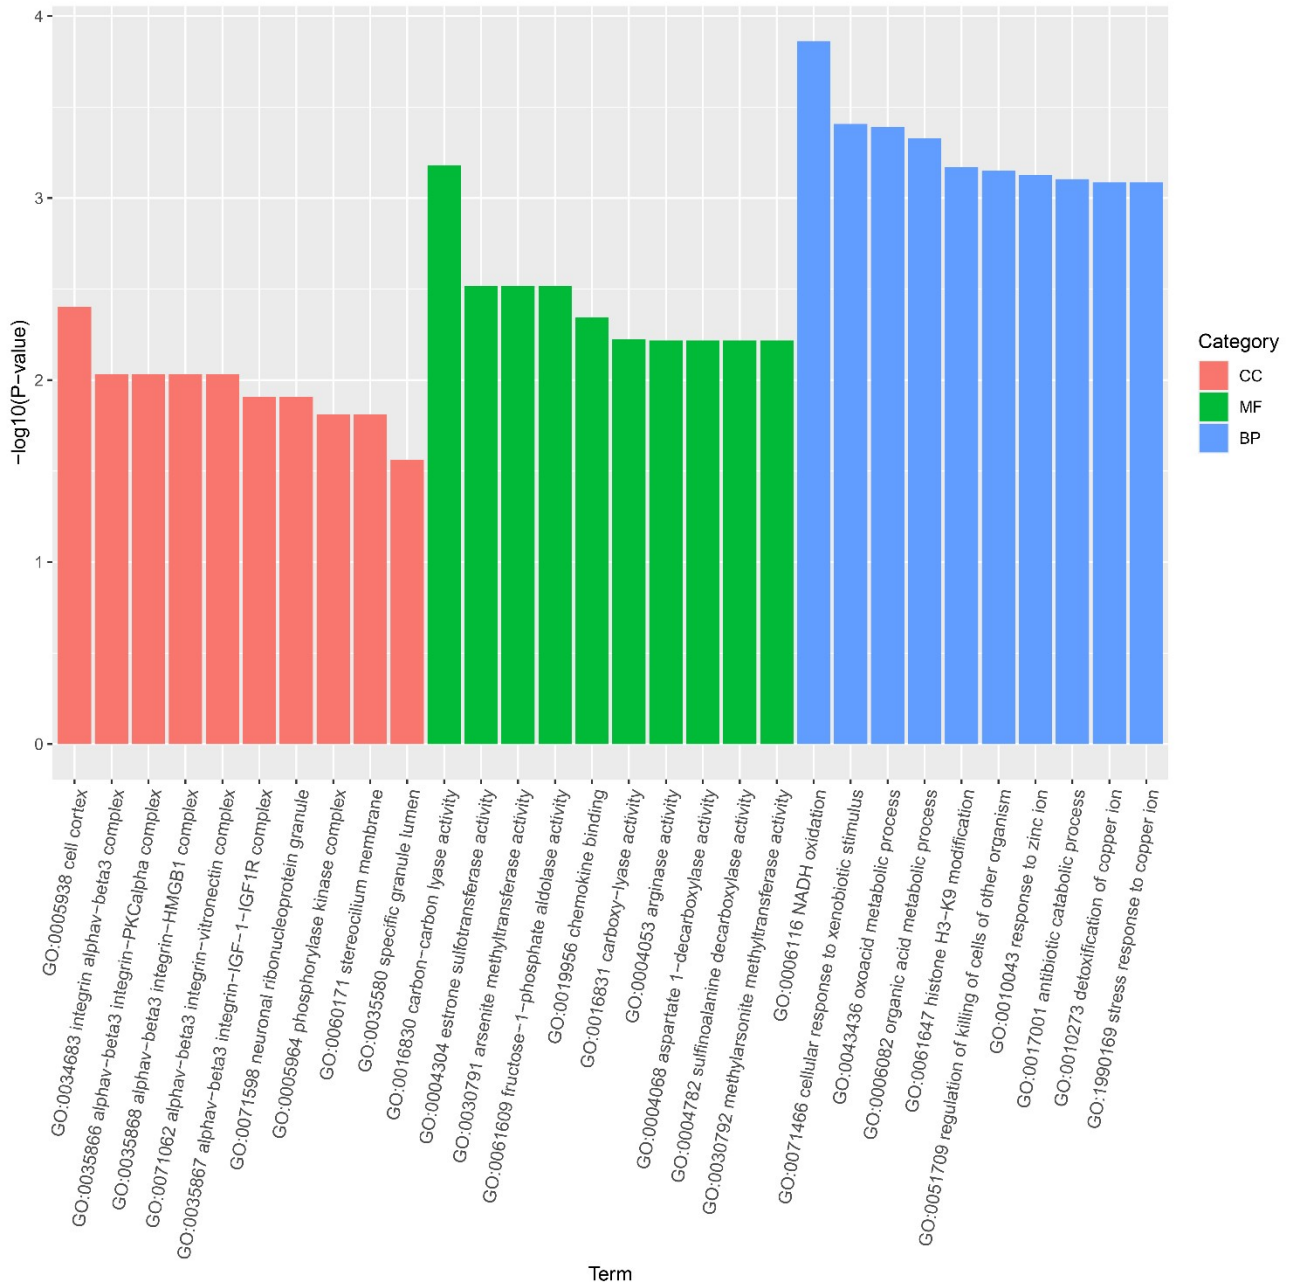

54
